# Supplementary material for: Steroidal Saponins with Plant Growth Stimulation Effects; Yucca schidigera as a Commercial Source
Source: MDPI journal article supplement (doi:10.3390/plants11233378), 2022-12-05
Supplement: s1 [file s1]

## *Supplementary Materials*

# Steroidal saponins with growth stimulation effects. *Yucca schidigera* as a commercial source

Alexandra G. Durán<sup>1</sup>, Juan M. Calle<sup>1</sup>, Andy J. Pérez<sup>2</sup>, Francisco A. Macías<sup>1</sup>, Ana M. Simonet<sup>1,\*</sup>

<sup>1</sup>Allelopathy Group, Department of Organic Chemistry, Institute of Biomolecules (INBIO), Campus de Excelencia Internacional (ceiA3), School of Science, University of Cadiz, C/ República Saharaui, 7, 11510 Puerto Real, Cadiz, Spain.

<sup>2</sup>Departamento de Análisis Instrumental, Facultad de Farmacia, Universidad de Concepción, Concepción, Chile.

\* E-mail: [ana.simonet@uca.es](mailto:ana.simonet@uca.es)

## Table of Contents

|                                                                                                                                                  |    |
|--------------------------------------------------------------------------------------------------------------------------------------------------|----|
| <b>Table S1.</b> HMAI Table of $^{13}\text{C}$ NMR chemical shifts for doublets.....                                                             | 3  |
| <b>Table S2.</b> HMAI Table of $^{13}\text{C}$ NMR chemical shifts for singlets.....                                                             | 4  |
| <b>Table S3.</b> UPLC-QTOF/MS <sup>E</sup> data for the saponins in the chromatogram window from 5 to 8 minutes of the crude extract YS-But..... | 5  |
| <b>Figure S1.</b> $^1\text{H}$ NMR spectrum of fraction YS-But-BCA (600 MHz, Pyridine- <i>d</i> 5).....                                          | 6  |
| <b>Figure S2.</b> $^1\text{H}$ NMR spectrum of fraction YS-But-BBA (600 MHz, Pyridine- <i>d</i> 5).....                                          | 7  |
| <b>Figure S3.</b> HMBC spectrum for fractions YS-But-BCA and YS-But-BBA.....                                                                     | 8  |
| <b>Figure S4.</b> HMAI Flowchart of doublets with notes.....                                                                                     | 9  |
| <b>Figure S5.</b> HMAI Flowchart of singlets with notes.....                                                                                     | 10 |
| <b>Figure S6.</b> TOCSY-1D spectra obtained selected anomeric protons of sugar chain S1.....                                                     | 11 |
| <b>Figure S7.</b> ROESY-1D spectra obtained selected anomeric protons of sugar chain S1.....                                                     | 12 |
| <b>Figure S8.</b> TOCSY-1D spectra obtained selected anomeric protons of sugar chain S2.....                                                     | 13 |
| <b>Figure S9.</b> ROESY-1D spectra obtained selected anomeric protons of sugar chain S2.....                                                     | 14 |

**Table S1.** HMAI Table of  $^{13}\text{C}$  NMR chemical shifts for doublets. HMBC correlations with doublet signals of methyl groups C-21 and C-27.  
(From Simonet et al., *Phytochem. Anal.*, 2021: 32, 38-61).

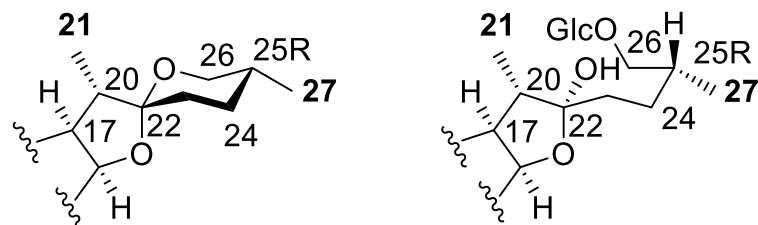

| Structural Features |      |             |              |      |      | HMBC signals |      |      |      |      |       |       |       |      |
|---------------------|------|-------------|--------------|------|------|--------------|------|------|------|------|-------|-------|-------|------|
| C-9                 | C-12 | C-23        | C-24         | C-22 | C-25 | H-27         | C-24 | C-25 | C-26 | H-21 | C-17  | C-20  | C-22  | Data |
| DB                  | CO   |             |              | SP   | R    | 0.67         | 29.1 | 30.6 | 66.7 | 1.12 | 62.9  | 41.9  | 109.3 | 1    |
|                     |      |             |              | SP   | DB   | -            | -    | -    | -    | 1.08 | 63.2  | 41.9  | 109.4 | 11   |
|                     |      |             |              | F    | R    | 0.96         | 28.5 | 34.4 | 75.3 | 1.30 | 63.9  | 40.8  | 110.7 | 43   |
|                     |      |             |              | FM   | R    | 0.98         | 28.2 | 34.2 | 75.2 | 1.16 | 64.1  | 40.5  | 112.7 | 44   |
|                     |      | OH $\alpha$ | OGlc $\beta$ | SP   | R    | 0.72         | 38.9 | 31.8 | 66.0 | 1.16 | 62.6  | 35.9  | 111.7 | 58   |
|                     |      |             |              | SP   | R*   | 1.12         | 81.5 | 38.2 | 65.1 | 1.02 | 62.3  | 42.1  | 111.6 | 62   |
|                     |      | OH $\alpha$ | OGlc $\beta$ | SP   | R*   | 1.19         | 87.9 | 37.9 | 64.1 | 1.15 | 62.0  | 34.6  | 112.7 | 60   |
|                     |      |             |              | SP   | S    | 1.05         | 26.2 | 27.5 | 65.2 | 1.35 | 54.2  | 43.1  | 109.8 | 24   |
|                     |      | SP          | R            | 0.64 | 29.2 | 30.5         | 66.9 | 1.31 | 54.3 | 42.6 | 109.3 | 18    |       |      |
|                     |      | F           | R            | 0.96 | 28.4 | 34.3         | 75.3 | 1.53 | 54.9 | 41.3 | 110.9 | 32    |       |      |
|                     |      | F           | S            | 1.01 | 28.3 | 34.4         | 75.3 | 1.51 | 54.8 | 41.3 | 110.8 | 34    |       |      |
|                     |      | SP          | R            | 0.67 | 29.2 | 30.5         | 67.0 | 1.38 | 54.5 | 43.0 | 109.5 | 28    |       |      |
|                     |      | OH $\beta$  | SP           | R    | 0.67 | 29.4         | 30.7 | 66.9 | 1.41 | 63.0 | 43.1  | 109.6 | 47    |      |

OH: hydroxyl; DB: double bond; CO: carbonyl; SP: spirostane; F: furostane; R/S/ $\alpha$ / $\beta$ : chiral center configuration.

\* R is the relative configuration; S is the absolute configuration because a glucopyranosyloxy moiety is at C-24.

**Table S2.** HMAI Table of  $^{13}\text{C}$  NMR chemical shifts for singlets. HMBC correlations with singlet signals of methyl groups C-18 and C-19. (From Simonet et al., *Phytochem. Anal.*, 2021: 32, 38-61).

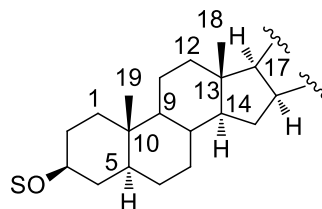

| Structural Features |          |               |     |            |      |             |              | HMBC signals |       |      |      |      |      |      |       |       |      |           |  |
|---------------------|----------|---------------|-----|------------|------|-------------|--------------|--------------|-------|------|------|------|------|------|-------|-------|------|-----------|--|
| C-2                 | C-5      | C-6           | C-9 | C-12       | C-22 | C-23        | C-24         | H-18         | C-12  | C-13 | C-14 | C-17 | H-19 | C-1  | C-5   | C-9   | C-10 | Data      |  |
|                     | $\alpha$ |               |     |            | SP   |             |              | 0.80         | 40.0  | 40.5 | 56.1 | 62.9 | 0.62 | 36.9 | 44.4  | 54.1  | 35.6 | <b>1</b>  |  |
|                     | $\alpha$ |               |     |            | SP   | OH $\alpha$ | OGlc $\beta$ | 1.01         | 40.7  | 41.4 | 56.6 | 62   | 0.75 | 37.5 | 45.6  | 54.6  | 35.9 | <b>60</b> |  |
|                     | $\alpha$ |               |     | CO         | SP   |             |              | 1.03         | 212.8 | 55.4 | 55.9 | 54.3 | 0.61 | 36.6 | 44.4  | 55.5  | 36.3 | <b>18</b> |  |
|                     | $\alpha$ |               | DB  | CO         | SP   |             |              | 0.98         | 204.3 | 51.3 | 52.7 | 54.5 | 0.79 | 35.0 | 42.5  | 171.3 | 39.5 | <b>28</b> |  |
| OH $\alpha$         | $\alpha$ |               | DB  | CO         | SP   |             |              | 0.97         | 204.3 | 51.4 | 52.7 | 54.6 | 0.86 | 43.5 | 42.5  | 170.5 | 40.6 | <b>55</b> |  |
|                     | $\alpha$ |               |     | OH $\beta$ | SP   |             |              | 1.06         | 79.3  | 46.6 | 55.2 | 63.0 | 0.64 | 37.2 | 44.7  | 53.6  | 35.9 | <b>47</b> |  |
| OH $\alpha$         | $\alpha$ |               |     |            | SP   |             |              | 0.78         | 40.0  | 40.6 | 56.3 | 63.0 | 0.69 | 45.6 | 44.6  | 54.3  | 36.8 | <b>35</b> |  |
|                     | $\beta$  |               |     |            | SP   |             |              | 0.79         | 40.3  | 40.9 | 56.5 | 63.1 | 0.84 | 30.8 | 36.9  | 40.2  | 35.2 | <b>4</b>  |  |
| OH $\beta$          | $\beta$  |               |     |            | SP   |             |              | 0.77         | 40.2  | 40.8 | 56.3 | 63.1 | 0.87 | 40.5 | 36.4  | 41.4  | 36.9 | <b>38</b> |  |
|                     | DB       |               |     |            | SP   |             |              | 0.80         | 39.9  | 40.5 | 56.7 | 62.9 | 0.85 | 37.5 | 141.1 | 50.3  | 37.1 | <b>9</b>  |  |
|                     | DB       |               |     | CO         | F    |             |              | 1.13         | 212.9 | 55.4 | 56.0 | 54.9 | 0.91 | 37.0 | 140.9 | 52.4  | 37.6 | <b>32</b> |  |
| OH $\alpha$         | DB       |               |     |            | SP   |             |              | 0.78         | 39.8  | 40.5 | 56.5 | 62.9 | 0.91 | 45.8 | 140.1 | 50.2  | 38.0 | <b>40</b> |  |
| OH $\alpha$         | DB       |               |     |            | SP   |             | OGlc $\beta$ | 0.71         | 39.7  | 40.4 | 56.5 | 62.3 | 0.91 | 45.7 | 140.1 | 50.1  | 37.9 | <b>62</b> |  |
| OH $\alpha$         | DB       |               |     |            | F    |             |              | 0.85         | 39.9  | 40.8 | 56.5 | 63.9 | 0.92 | 45.8 | 140.1 | 50.3  | 38.0 | <b>43</b> |  |
| OH $\alpha$         | DB       |               |     |            | FM   |             |              | 0.77         | 39.6  | 40.8 | 56.4 | 64.1 | 0.91 | 45.7 | 140.1 | 50.2  | 37.9 | <b>44</b> |  |
|                     | $\alpha$ | OH $\alpha$   |     |            | SP   |             |              | 0.81         | 40.0  | 40.7 | 56.2 | 62.9 | 0.68 | 37.6 | 52.1  | 54.0  | 36.4 | <b>45</b> |  |
|                     | $\alpha$ | OGlc $\alpha$ |     |            | SP   |             |              | 0.76         | 40.0  | 40.8 | 56.4 | 63.0 | 0.68 | 37.5 | 50.9  | 53.8  | 36.7 | <b>46</b> |  |
|                     | $\alpha$ | OGlc $\alpha$ |     |            | SP   | OH $\alpha$ |              | 0.96         | 22.7  | 41.4 | 56.5 | 62.6 | 0.74 | 37.8 | 51.3  | 54.0  | 36.8 | <b>58</b> |  |

OH: hydroxyl; DB: double bond; CO: carbonyl; SP: spirostane; F: furostane;  $\alpha/\beta$ : chiral center configuration.

**Table S3.** UPLC-QTOF/MS<sup>E</sup> data for the saponins in the chromatogram window from 5 to 8 minutes of the crude extract YS-But.

| Retention time (min.) | [M – H] <sup>–</sup> | Fragmentation ( <i>m/z</i> ) |
|-----------------------|----------------------|------------------------------|
| 6.31                  | 901.4745             | 739.4255, 577.3707           |
| 5.61                  | 901.4756             | 739.4235, 577.3746           |
| 5.36                  | 899.4613             | 737.4082, 575.3576           |
| 7.07                  | 871.4670             | 739.4254, 577.3730           |
| 6.94                  | 871.4661             | 739.4251, 577.3732           |
| 6.09                  | 869.4522             | 737.4103, 577.3730           |

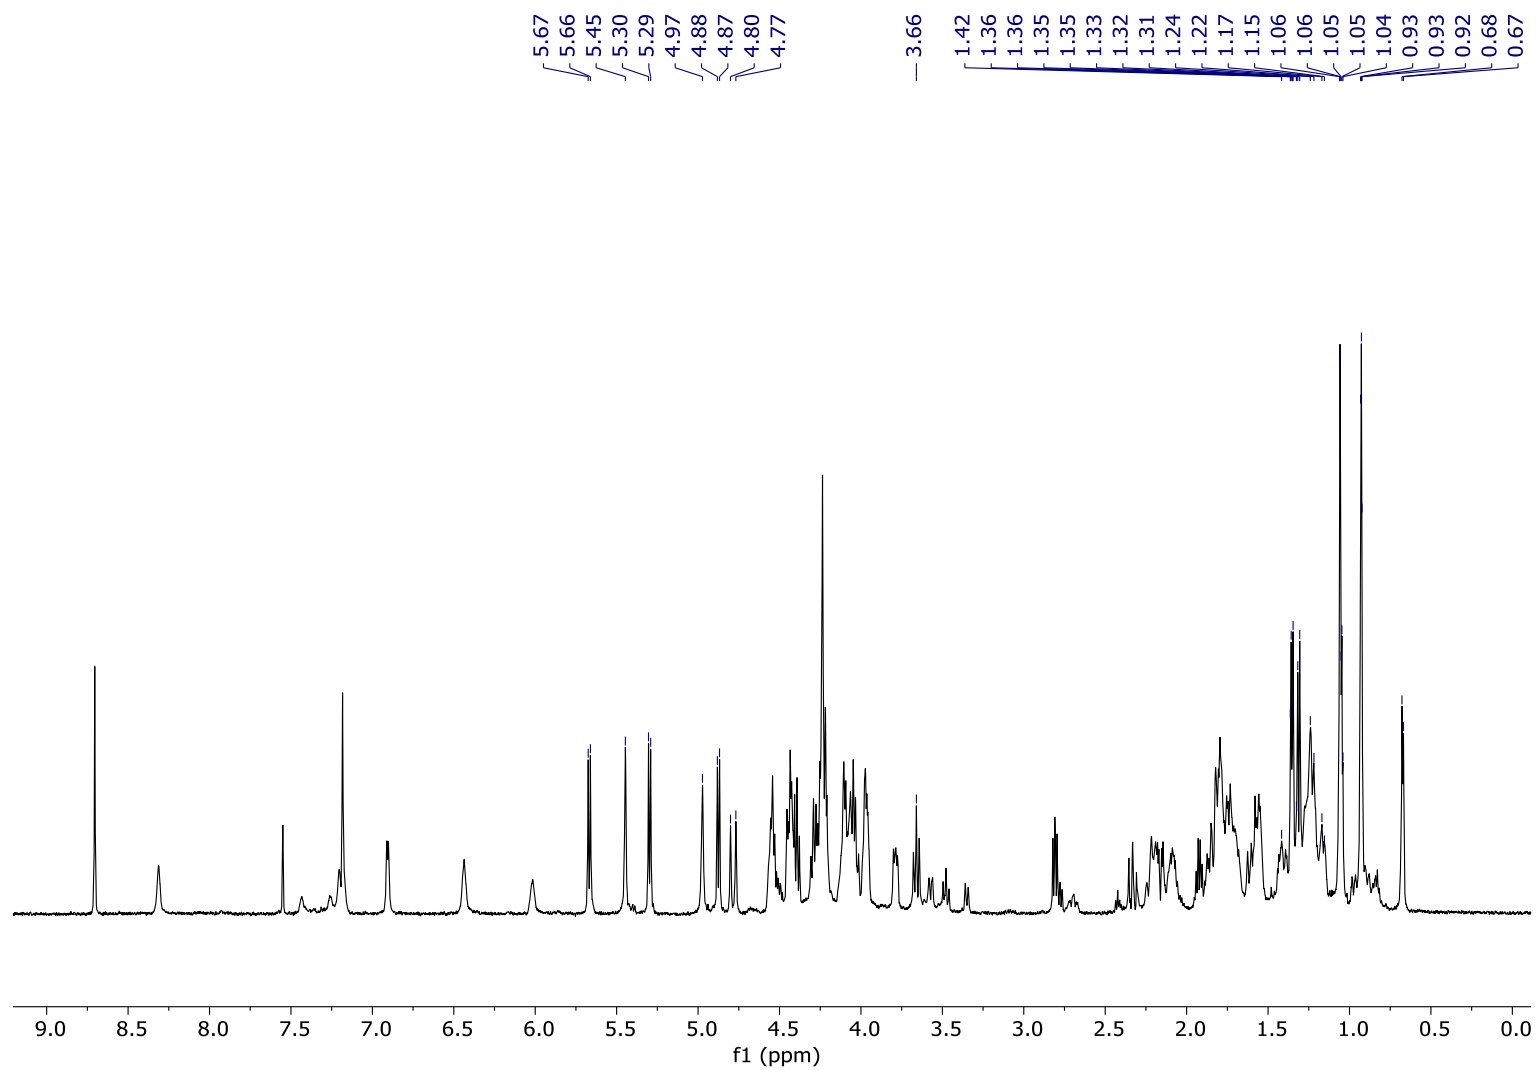

**Figure S1.** <sup>1</sup>H NMR spectrum of fraction YS-But-BBA (600 MHz, Pyridine-*d*<sub>5</sub>).

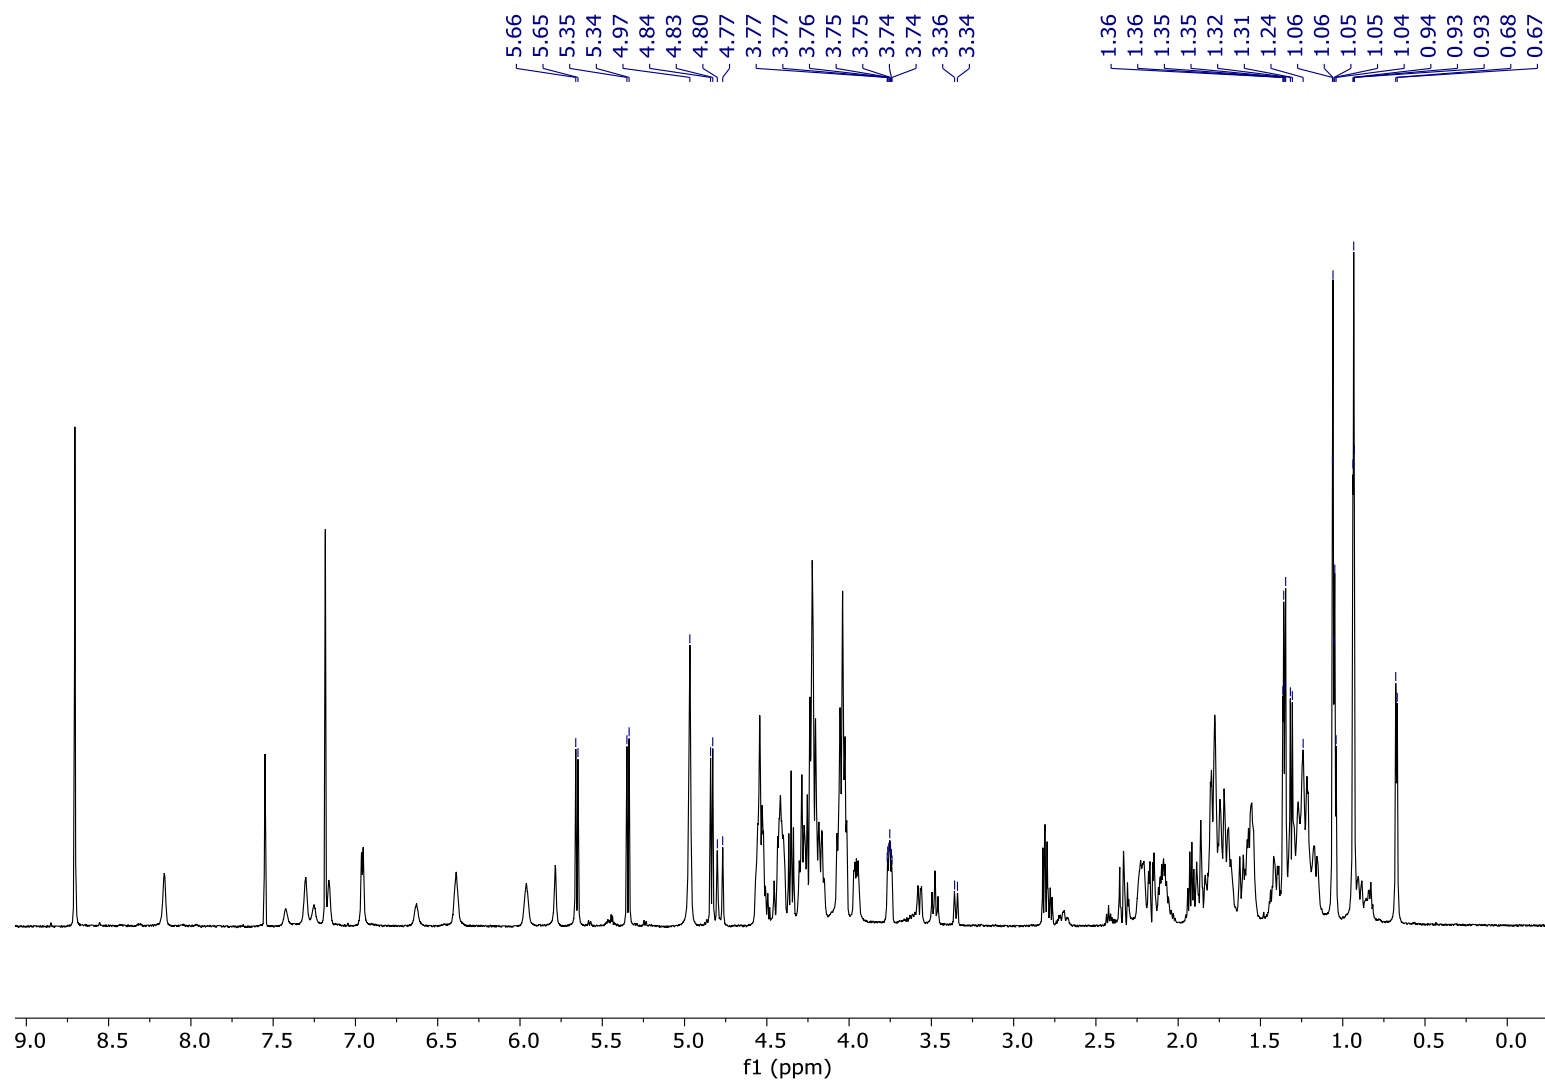

**Figure S2.**  $^1\text{H}$  NMR spectrum of fraction YS-But-BCA (600 MHz, Pyridine- $d_5$ ).

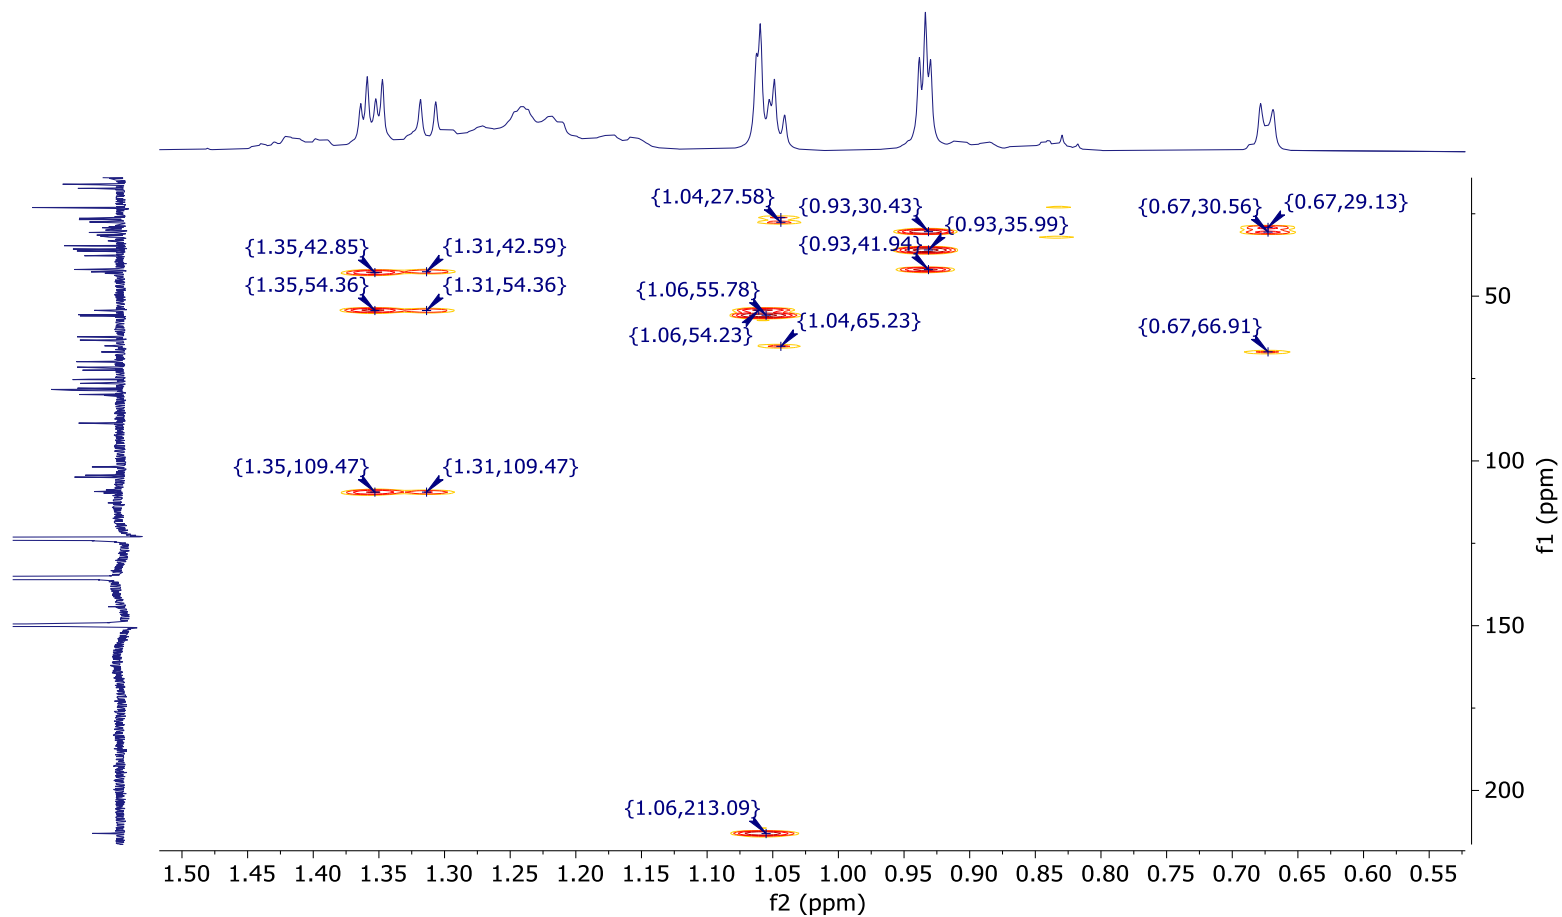

**Figure S3.** HMBC spectrum for fractions YS-But-BCA and YS-But-BBA (0.45 to 1.45 ppm; 600 MHz, Pyridine-*d*5).



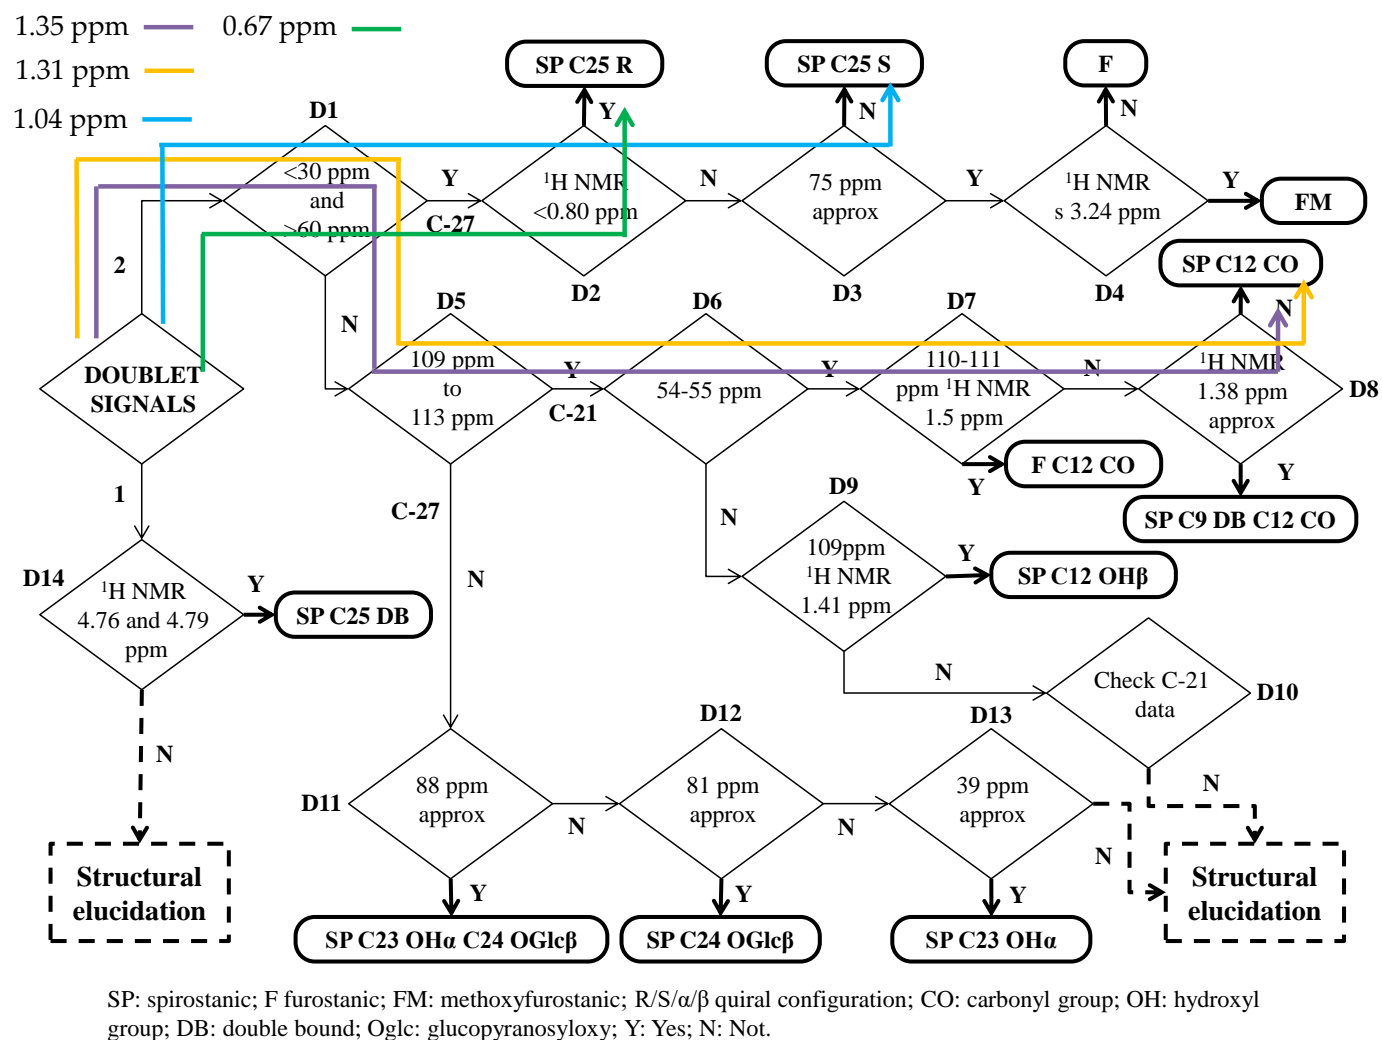

**Figure S4.** HMAI Flowchart of doublets with notes for fractions YS-But-BCA and YS-But-BBA.

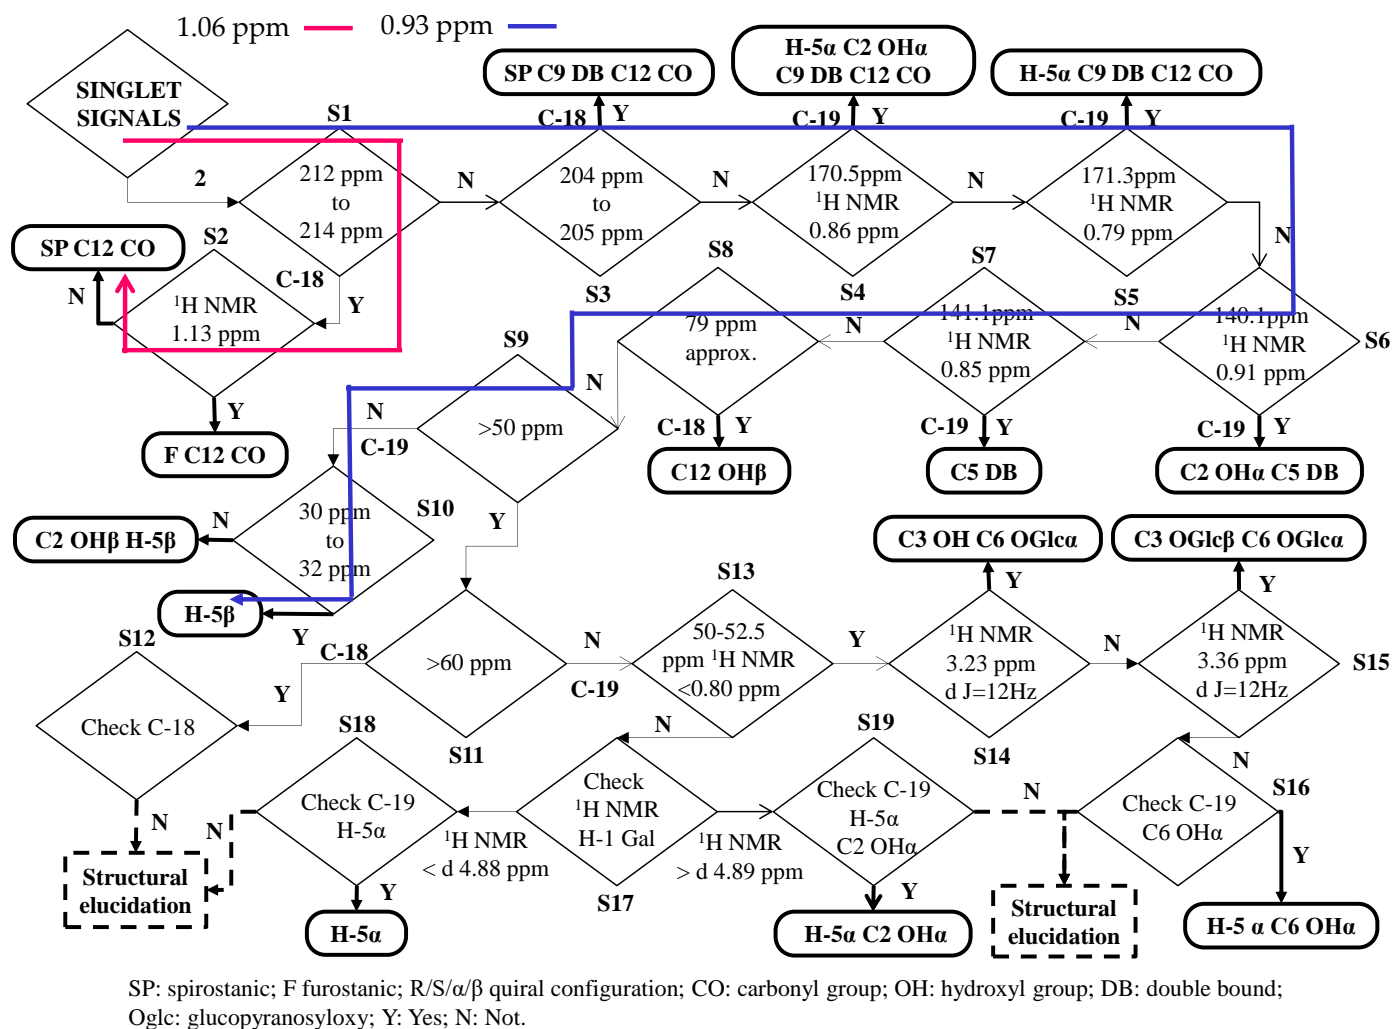

**Figure S5.** HMAI Flowchart of singlets with notes for fractions YS-But-BCA and YS-But-BBA.

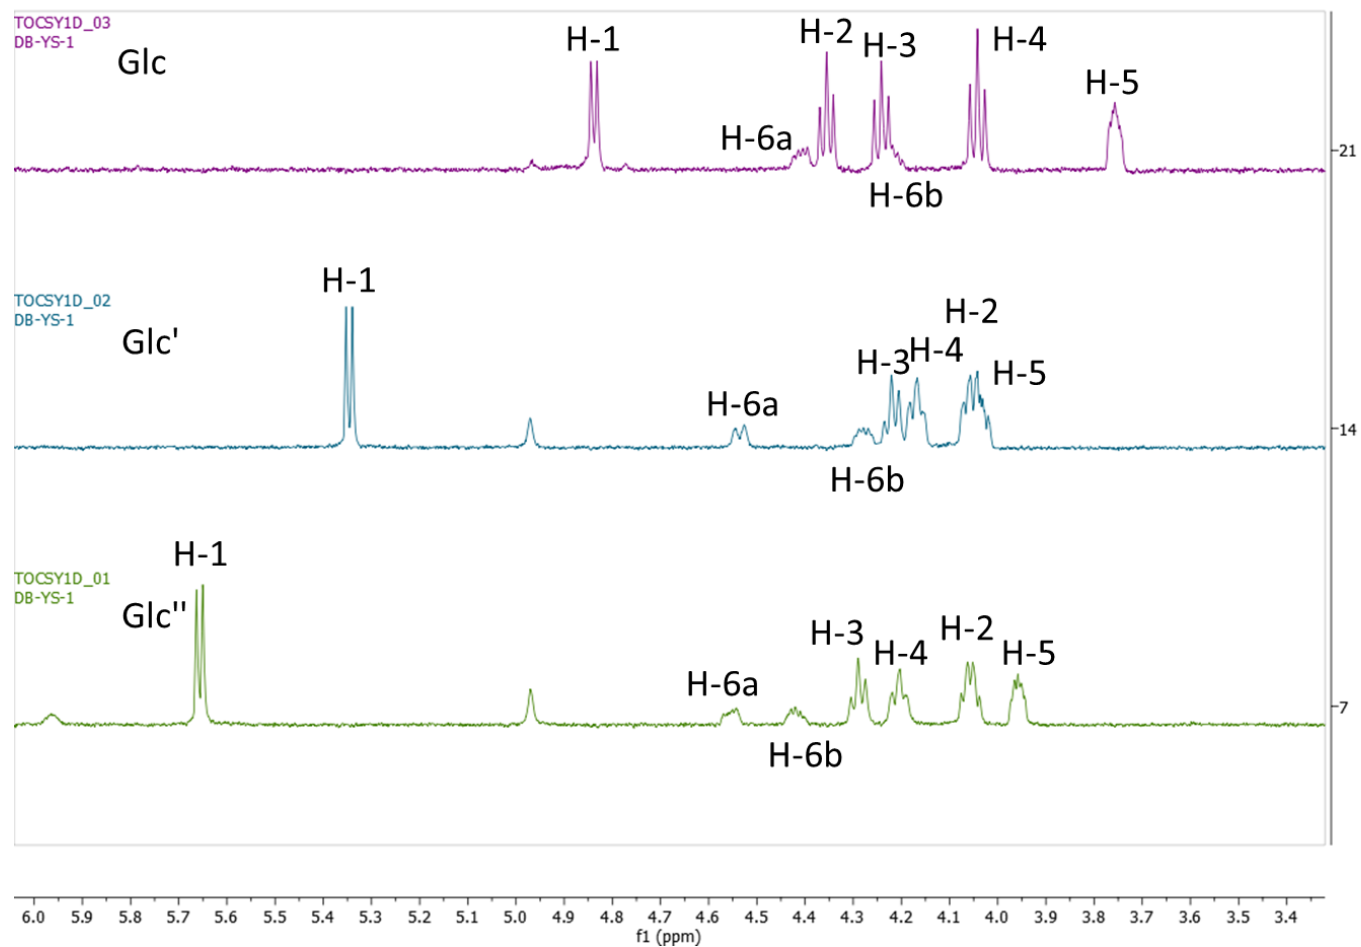

**Figure S6.** TOCSY-1D spectra obtained selected anomeric protons of sugar chain S1

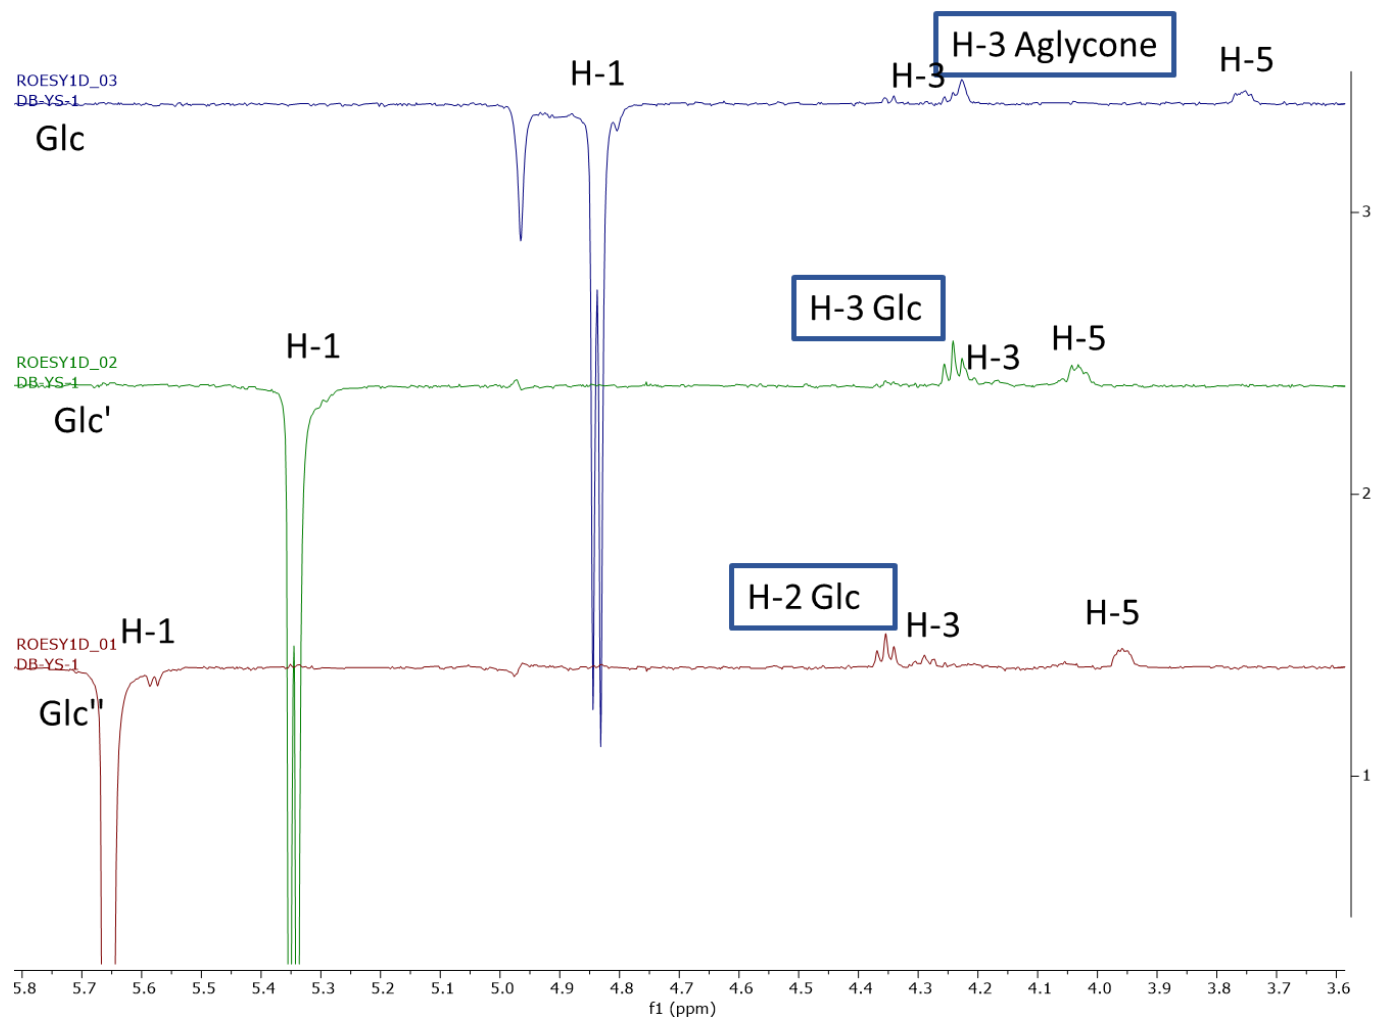

**Figure S7.** ROESY-1D spectra obtained selected anomeric protons of sugar chain S1

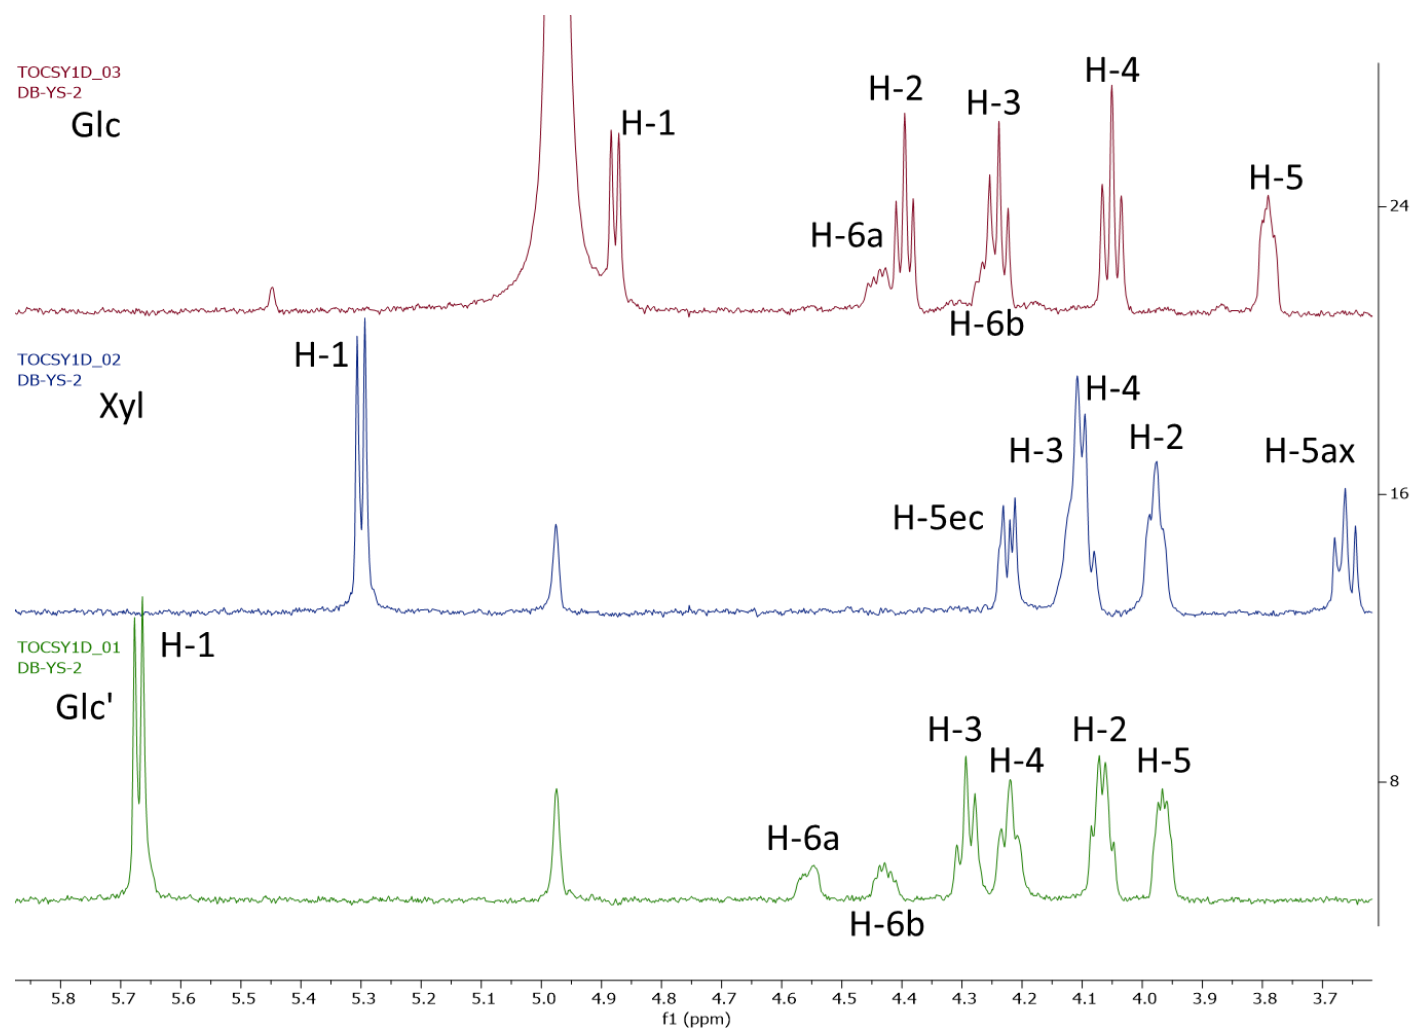

**Figure S8.** TOCSY-1D spectra obtained selected anomeric protons of sugar chain S2

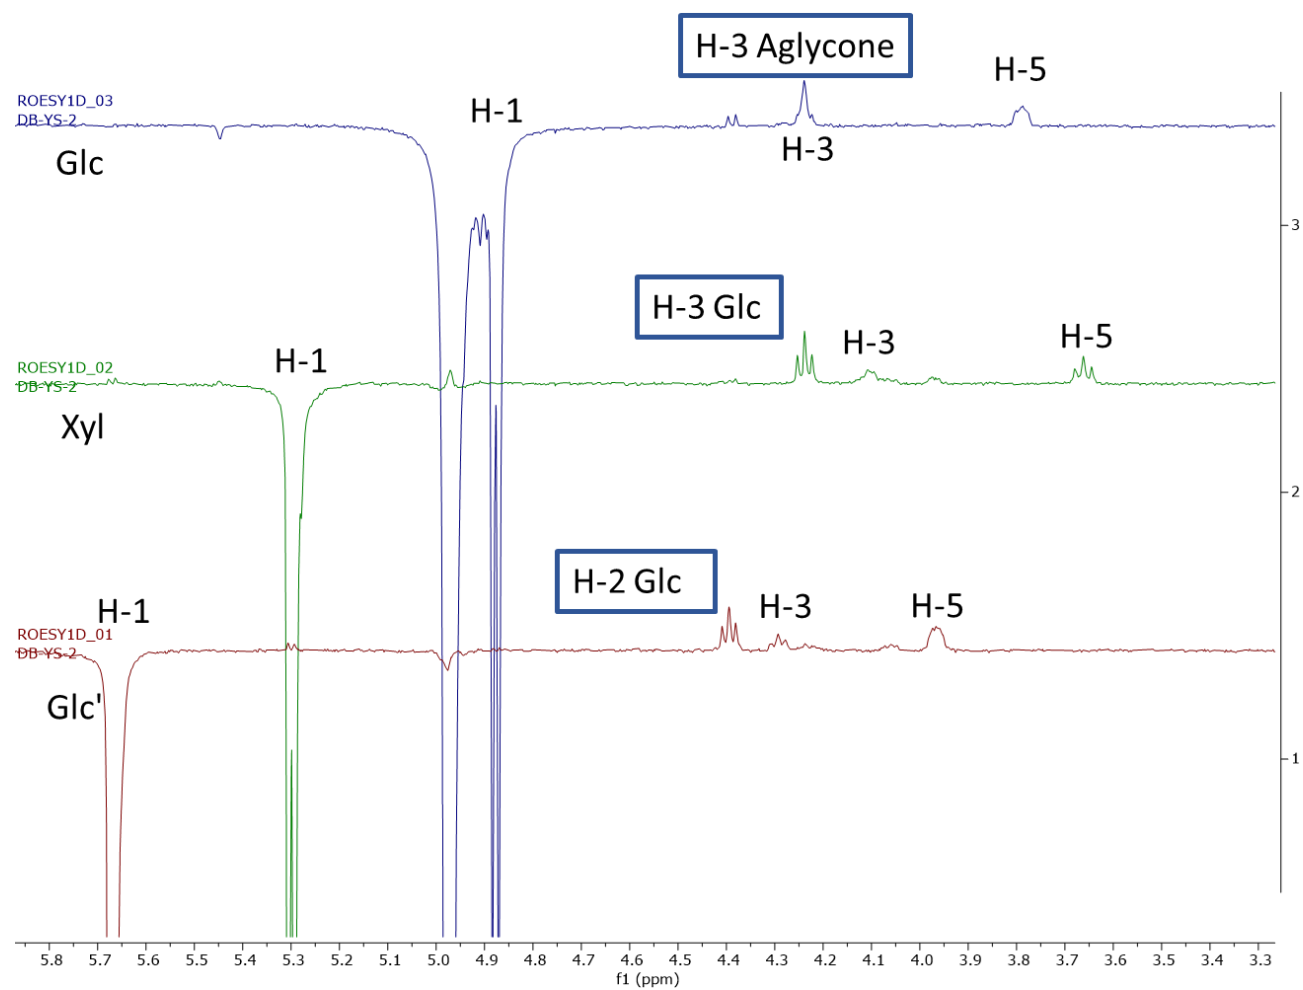

**Figure S9.** ROESY-1D spectra obtained selected anomeric protons of sugar chain S2
